## 1 ICTD: A semi-supervised cell type identification and deconvolution method for multi-omics data

2 Wennan Chang<sup>1, 2+</sup>, Changlin Wan<sup>1, 2+</sup>, Xiaoyu Lu<sup>1</sup>, Szu-wei Tu<sup>1</sup>, Yifan Sun<sup>1</sup>, Xinna Zhang<sup>1</sup>, Yong Zang<sup>3</sup>, Anru  
3 Zhang<sup>4</sup>, Kun Huang<sup>5</sup>, Yunlong Liu<sup>1</sup>, Xiongbin Lu<sup>1\*</sup>, Sha Cao<sup>4\*</sup>, Chi Zhang<sup>1, 2\*</sup>

4 <sup>1</sup>Department of Medical and Molecular Genetics and Center for Computational Biology and Bioinformatics,  
5 <sup>4</sup>Department of Medicine, <sup>3</sup>Department of Biostatistics, <sup>5</sup>Department of Medicine, Indiana University School of  
6 Medicine, Indianapolis, IN, 46202, USA.

7 <sup>2</sup>Department of Electrical and Computer Engineering, Purdue University, Indianapolis, IN, 46202, USA

8 <sup>4</sup>Department of Statistics, University of Wisconsin–Madison, Madison, WI 53706, USA

9 \*To whom correspondence should be addressed. +1 317-278-9625; Email: [c Zhang87@iu.edu](mailto:c Zhang87@iu.edu). Correspondence  
10 is also addressed to Xiongbin Lu, Email: [xiolu@iu.edu](mailto:xiolu@iu.edu); Sha Cao, Email: [shacao@iu.edu](mailto:shacao@iu.edu).

11 +These authors have equal contribution to this work.

### 12 Abstract

13 We developed a novel deconvolution method, namely Inference of Cell Types and Deconvolution (ICTD) that  
14 addresses the fundamental issue of identifiability and robustness in current tissue data deconvolution problem.  
15 ICTD provides substantially new capabilities for omics data based characterization of a tissue microenvironment,  
16 including (1) maximizing the resolution in identifying resident cell and sub types that truly exists in a tissue, (2)  
17 identifying the most reliable marker genes for each cell type, which are tissue and data set specific, (3) handling  
18 the stability problem with co-linear cell types, (4) co-deconvoluting with available matched multi-omics data, and  
19 (5) inferring functional variations specific to one or several cell types. ICTD is empowered by (i) rigorously derived  
20 mathematical conditions of identifiable cell type and cell type specific functions in tissue transcriptomics data and  
21 (ii) a semi supervised approach to maximize the knowledge transfer of cell type and functional marker genes  
22 identified in single cell or bulk cell data in the analysis of tissue data, and (iii) a novel unsupervised approach to  
23 minimize the bias brought by training data. Application of ICTD on real and single cell simulated tissue data  
24 validated that the method has consistently good performance for tissue data coming from different species, tissue  
25 microenvironments, and experimental platforms. Other than the new capabilities, ICTD outperformed other state-  
26 of-the-art devolution methods on prediction accuracy, the resolution of identifiable cell, detection of unknown sub  
27 cell types, and assessment of cell type specific functions. The premise of ICTD also lies in characterizing cell-  
28 cell interactions and discovering cell types and prognostic markers that are predictive of clinical outcomes.

### 29 Introduction

30 Tissue deconvolution aims to disentangle the cell composition in terms of their relative quantities, based on  
31 which, the cell type specific functions and their cross-talks in the tissue microenvironment could be studied<sup>1 2 3</sup>  
32 <sup>4</sup>. Existing deconvolution algorithms usually assume the observed expression matrix as a product of a cell type  
33 signature matrix  $S$  and proportion matrix  $P$ <sup>2 3 4</sup>. Independent training data is usually needed to impose prior on  
34  $S$  via certain information transfer<sup>2 5 6 7</sup>. The recent emergence of single cell RNA-seq (scRNA-seq) allows  
35 researchers to uncover new biological traits in cell populations of bulk tissue<sup>8</sup>. Regardless, the knowledge  
36 transfer from training single/bulk cell data to target bulk tissue should be carefully handled, as the gene  
37 expression distribution of the two domains could be highly variable, which tend to be oversimplified in current  
38 deconvolution methods<sup>9</sup>. Novel or rare cell subtypes are of great interest to researchers<sup>10</sup>. However, current  
39 deconvolution algorithms usually assume a fixed pool of cell types, which clearly is incapable of identifying novel  
40 sub cell types<sup>2 3 4</sup>. Moreover, certain cell types such as immune cells tend to co-infiltrate in a real tissue,  
41 suggesting that the proportions of these cell populations are highly co-linear<sup>11</sup>. As a result, estimating  
42 proportions with plain linear regression model or non-negative factorization would suffer from multi-collinearity,  
43 leading to highly unstable predictions<sup>12 13</sup>. Recent methods such as Cell Population Mapping (CPM) and  
44 CIBERSORTx have been developed to predict cell type specific functions<sup>14 9</sup>. However, they rely on precisely  
45 predicted cell proportions, and matched scRNA-seq profiles of similar tissues, which limited their applications to  
46 a wider extent. It is also noteworthy that none of the existing deconvolution methods is designed to handle highly  
47 varied tissue microenvironments or multi-omics data. Here, we summarize the key challenges of deconvolution  
48 methods as (i) detect the resident (sub) cell types and their true marker genes dependent on the tissue<sup>15</sup> (ii)  
49 handle systematic expression variations from training to target data domain; (iii) deal with the prevalent co-

50 linearity in the cell type specific expression signatures and cell proportions; (iv) define expression patterns that  
51 represent varied cell type specific functions; (v) enable application to a variety of tissue microenvironment and  
52 multi-omics data types. More detailed discussions and comparisons of the formulations of existing methods are  
53 provided in the **Supplementary Notes**.

54 Based on a preliminary evaluation of the variations of known cell type signature genes in a large set of single  
55 and bulk cell data, we first derived mathematical conditions for a cell type to be “identifiable” in a tissue omics  
56 data: (1) the cell type has uniquely expressed genes, the expression values of which over any subset of samples  
57 form a rank-1 matrix (a matrix with matrix rank equals to one), or (2) there are genes expressed by the cell type  
58 and other cell types satisfy (1), and the expression values contributed by the cell type over any subset of samples  
59 form a rank-1 matrix. And a cell type-specific function is “identifiable” if there are marker genes of the function  
60 forming a rank-1 submatrix in a subset of samples with significant presence of the cell type. These “identifiability”  
61 conditions grant the potential to detect novel cell subtypes or cell functions via the detection of low rank matrices.  
62 Detailed mathematical considerations and derivations were given in **Online Methods and Supplementary**  
63 **Notes**.

64 Based on the rigorously derived mathematical conditions, we developed a semi-supervised method, namely  
65 inference of cell types and deconvolution (ICTD), featured by: (1) a semi-supervised detection of “identifiable”  
66 cell types and marker genes specific to each omics dataset and tissue micro-environment; (2) a novel  
67 nonparametric detection and annotation of cell type signature genes, which is used as information basis to  
68 annotate the identified cell types; (3) a novel constrained non-negative matrix factorization (NMF) method to  
69 decrease the bias caused by knowledge transfer from training data, as well as to effectively handle the co-  
70 occurring cells; (4) a robust regression based approach to interactively deconvolute multi-omics data of matched  
71 samples, and (5) a local-low-rank screening approach to identify cell type specific functions, which altogether  
72 offers a systematic solution of the five key challenges.

## 73 Results

74 Our core algorithm ICTD consists of six steps (**Fig 1**): (1) Compute the relative specificity of all genes for all cell  
75 types in a given microenvironment. A labeling matrix  $L_{M \times K}$  of  $M$  genes and  $K$  selected cell types is first  
76 constructed based on training single or bulk cell transcriptomics data, where  $L_{i,j} = \frac{1}{l}$ ,  $l = 1, \dots, K - 1$ , if gene  $i$  is  
77 significantly expressed in cell type  $j$  and its expression is significantly lower than in  $l - 1$  other cell types, and  
78  $L_{i,j} = 0$  otherwise (Supplementary Table S1). Without loss of generality, we assume that all the  $M$  genes are  
79 specific to one or a few cell types, namely,  $\sum_j L_{i,j} > 0, \forall i = 1, \dots, M$ . (2) Detect all gene modules within which the  
80 gene expression vectors are linearly dependent and form rank-1 matrix, and the modules present evidence of  
81 “identifiable” cell types. For each gene module detected on the target tissue expression matrix among the  $M$   
82 genes, if its member genes are all highly expressed in one or several cell types according to the labeling matrix,  
83 the module will be considered as evidence of potential cell type(s) by ICTD. In this step, ICTD can exclude  
84 undesired cell types, such as cancer or other disease cells, from further analysis, by a non-negative projection  
85 of the input data to the complementary of the space spanned by the marker genes of undesired cell types. (3)  
86 Infer the “identifiable” cell types and signature genes. Non-negative linear dependency among the selected  
87 modules is evaluated and each module is annotated by the genes’ significant enrichment to a cell type based on  
88 the labeling matrix. Modules are merged with high inter-dependency, and further filtered such that modules  
89 enriching none of the cell types are removed. The total number of “identifiable” cell types is computed as the  
90 total rank of the expression matrix composed by all genes in the remaining rank-1 modules, the genes in each  
91 module will be considered as markers of the corresponding cell type. (4) Predict cell proportions using  
92 constrained NMF. With the “identifiable” cell types and their marker genes, a constraint matrix  $C_{M \times K}$  can be  
93 constructed. Specifically, for cell type  $k, k = 1..K$  with  $M_k$  marker genes,  $C_{(\sum_{k=1..K} M_k) \times K}[i, j] = 1$ , if gene  $i$  is  
94 marker of the cell type  $j$ , and 0 otherwise. The constraint matrix is then enforced upon the regular NMF  
95 formulation to guarantee similarity of the signature matrix with the constraint matrix, namely, we solve  
96  $\min_{S, P} \left( \|X - S \cdot P\|_F^2 + \lambda \cdot \text{trace}(S^T \cdot (\mathbf{1}_M \mathbf{1}_K^T - C)) \right)$ , where  $\mathbf{1}_d$  denotes an all-1 column vector of length  $d$ . (5) Co-  
97 deconvolution of matched multi-omics data. The semi-supervised property of ICTD enable its application to multi-  
98 omics data. A robust regression approach is further applied to identify the cell types and samples, in which the  
99 cell proportions inferred from different omics-data are highly consistent. (6) Estimate cell type specific functions.  
100 For each cell type detected, ICTD screens the rank of the expression matrix containing a group of samples which

101  
102  
103

are stratified by their cell abundance levels, and pins down marker genes of a varied cell type specific function if they form at least one distinct dimension.

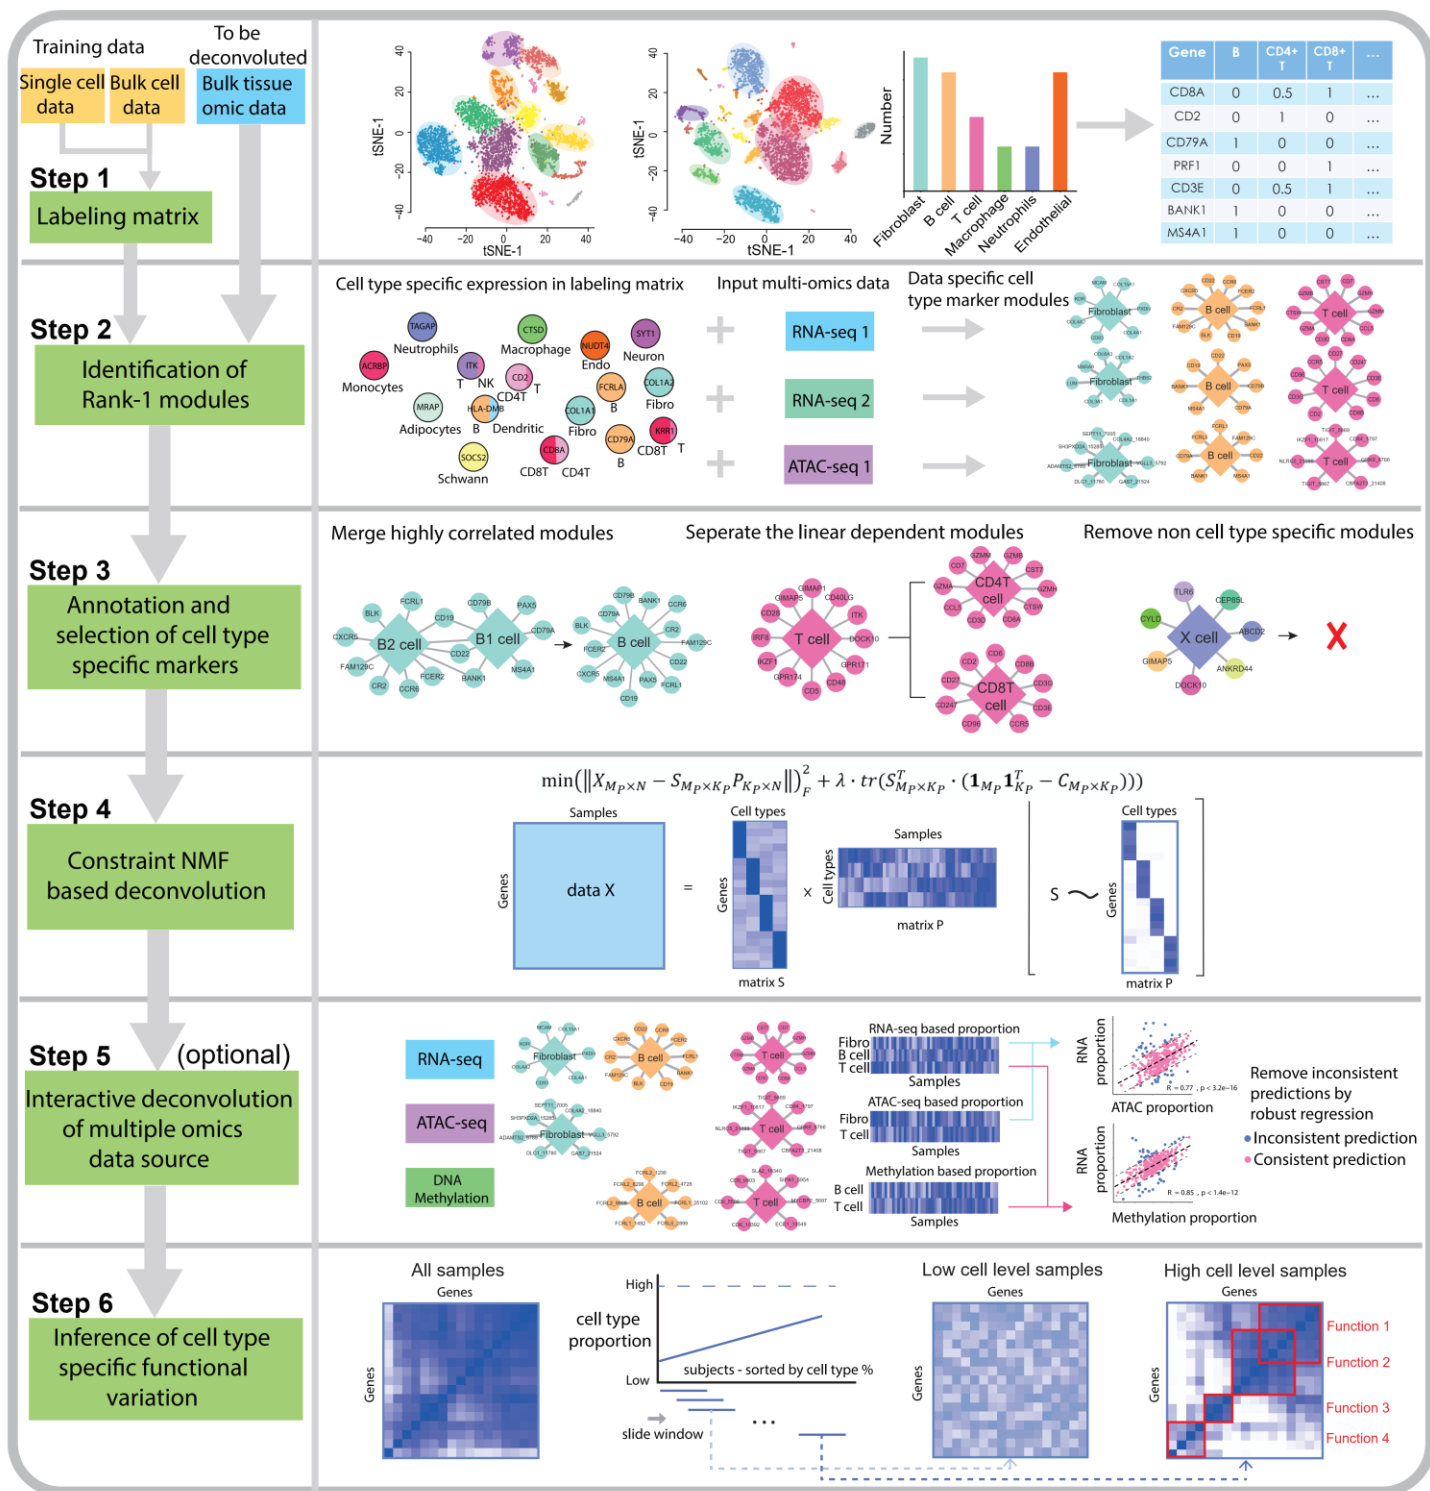

104

105 **Figure 1. Analysis pipeline of ICTD.** ICTD first constructs labeling matrix to store genes' relative specificity to different cell  
 106 types using bulk or single cell training data (Step 1). Rank-1 modules were detected among the cell type marker genes in  
 107 each input omics dataset (Step 2). Similar modules were merged, modules that do not (non-negatively) depend on other  
 108 modules are kept, and modules that do not overrepresent any cell type markers are removed. The number of cell types  
 109 of the target deconvolution is determined as the total rank of the expression matrix of genes in the remaining modules  
 110 (Step 3). A constrained NMF is conducted to regularize the signature matrix  $S$ , such that values in  $S$  are shrunken towards  
 111 0 if the corresponding entries in the constraint matrix is 0. (Step 4). If matched multi-omics data are available, robust

112 regression among cell proportions inferred from different omics data set is performed to remove outlier samples (Step 5,  
113 optional). Marker genes of cell type specific functions are further identified by looking for local low rank submatrices in  
114 sample groups stratified by different level of the cell proportion (Step 6).

115 The core algorithms for each step are described in the **Online Methods**. Detailed algorithms, data used for  
116 method validation, and model comparisons with other methods, are provided in the **Supplementary Notes and**  
117 **Methods**. Below we present the application of ICTD on simulated bulk data using single cell RNA-seq data (**Fig.**  
118 **2**) and real tissue data (**Fig. 3**). We demonstrated (1) the ability of ICTD to identify both known and novel (sub)  
119 cell types with high accuracy, (2) the overall competitive performance of ICTD in analyzing data of different tissue  
120 microenvironment and experimental platforms, (3) the robustness of ICTD in cases where cell types have highly  
121 co-linear proportions, (4) ICTD's capability in interactive deconvolution of matched multi-omics data, (5) inference  
122 of cell type specific functions, and (6) explorative findings derived by correlating ICTD predicted cell and  
123 functional levels with other omics, imaging and clinical data.

#### 124 **Validation on single cell simulated bulk tissue data**

125 We benchmarked ICTD on predicting the types of resident cells and their relative proportions against three state-  
126 of-art deconvolution methods, namely CIBERSORT, TIMER, and EPIC (**Online Methods**), using single cell  
127 simulated bulk tissue datasets. The bulk tissue datasets were simulated by RNA-seq data of single cells or single  
128 nucleus from different tissue microenvironments, including five from human solid cancer (namely, breast, colon,  
129 head and neck, lung, and melanoma), five from human central nervous system (namely glioblastoma,  
130 oligodendroglioma, astrocytoma and two normal brain), three from human immune system (monocyte and  
131 dendritic cell, lymphoid, and myeloid progenitor cells), and one from mouse melanoma. On all five human solid  
132 cancer microenvironment, all mixing cell types were detected as "identifiable" by ICTD. In addition, ICTD  
133 achieved significantly higher accuracy in predicting total B-, T-, mast, fibroblast, endothelial cells and  
134 macrophage proportions comparing to other methods. On 23 out of the 25 cells type in the simulated bulk cancer  
135 datasets, ICTD predicted relative proportions achieved higher than 0.95 Pearson correlation coefficient (PCC)  
136 with true proportions, while the average PCC is 0.86, 0.63 and 0.52 for EPIC, TIMER and CIBERSORT,  
137 respectively (**Fig 2a**). On the five human brain microenvironments, ICTD successfully detected astrocyte,  
138 oligodendrocyte and progenitors, exhibitory and inhibitory neuron, microglial and Schwann cells as identifiable  
139 cell types, all with at least 0.9 PCC with true proportions (**Fig 2b**). Similarly, ICTD also accurately identified sub  
140 cell types from the mixture of multiple classes of monocyte and dendritic cells, human lymphoid and myeloid  
141 progenitors, and the immune and stromal cells in mouse melanoma microenvironment, with reliable prediction  
142 of proportions (**Fig 2b**).

143 *Novel cell types.* A unique feature of ICTD is its capability to automatically detect cell and sub cell types along  
144 with cell marker genes for effective cell (sub)type annotation. Our analysis on simulated cancer tissue data  
145 suggested that each of the rank-1 module corresponds to one cell or sub-cell type (Supplementary Fig S1). On  
146 the simulated human solid cancer datasets, ICTD was able to identify subtypes of immune/stromal cells,  
147 including CD4+ and CD8+ T cells, novel subtypes of fibroblast and myeloid cells. The sub cell type markers were  
148 further validated by the tSNE visualization, where the expression level of each marker set turns out to be specific  
149 to the associated cell types or subtypes (Supplementary Fig S2). As illustrated in **Fig 2c**, among the three  
150 fibroblast rank-1 modules identified by ICTD, one clearly corresponds to the general fibroblast (with COL1A1  
151 expression) type, and the other two correspond to two fibroblast subtypes (with COL8A1 or SERPINF1  
152 expression) in the simulated human melanoma data. We confirmed all the rank-1 modules identified by ICTD  
153 from all the single cell simulated tissue data are specifically expressed in only one cell type, suggesting the high  
154 specificity of ICTD in identifying true cell types.

155 *Variability of cell types and their marker genes.* It is noteworthy that the number of identifiable cell types could  
156 vary through disease contexts and data sets. Comparing to the fixed cell types assumed in most of the  
157 deconvolution methods, the number of cell types identified by ICTD highly matches the number of mixing cell  
158 types in each single cell simulated tissue data set (**Fig 2d**). We further investigated the level of variation for cell  
159 type markers through different disease contexts and data set. As shown in **Fig 2e**, there is a strong disease  
160 context specificity of T cell markers: only four T cell markers were shared by all the five cancer data sets, and  
161 19 T cell markers were shared in four out of the five data sets. We observed on average 93.75%, 90.36% and  
162 83.33% of the T cell markers utilized in CIBERSORT, TIMER and EPIC are specific to only three or less cancer  
163 types and only 65.21%, 69.57% and 13.04% of the common cell type marker genes were included in their  
164 signature matrix. Similar patterns are also seen for B and fibroblast cells (Supplementary Fig S3). In contrast,



165  
166  
167  
168  
169  
170  
171  
172  
173  
174  
175  
176  
177

ICTD considers the variations in both the identifiable cell types and cell type markers in different tissues and datasets, resulting in a better prediction accuracy throughout different scenarios (**Fig 2e-f**). An explanation score (ES) is defined for each marker gene to evaluate the goodness of fitting of the gene's expression by the predicted proportions of the cell types expressing the gene (**Online Methods**). High ES scores of the marker genes for one cell type is a necessary condition for the high prediction accuracy and specificity of the marker genes. We observed strong positive correlations between the ES scores and prediction accuracy using ICTD and EPIC, as these two methods rely on cell type uniquely expressed genes. Similarly, for CIBERSORT and TIMER, positive associations were also observed (**Fig 2g**). Analysis of six major immune and stromal cell types in five simulated bulk cancer data sets suggested that in general, when ES is below 0.8, the prediction accuracy is lower than 0.8; on the other hand, when ES is above 0.9, the prediction accuracy tends to higher than 0.9 (**Fig 2g**). We observed the ES of all the cell type specific markers identified by ICTD on the simulated cancer tissue data are all above 0.95. It is noteworthy ES can partially evaluate the performance of a deconvolution method without knowing true cell proportions.

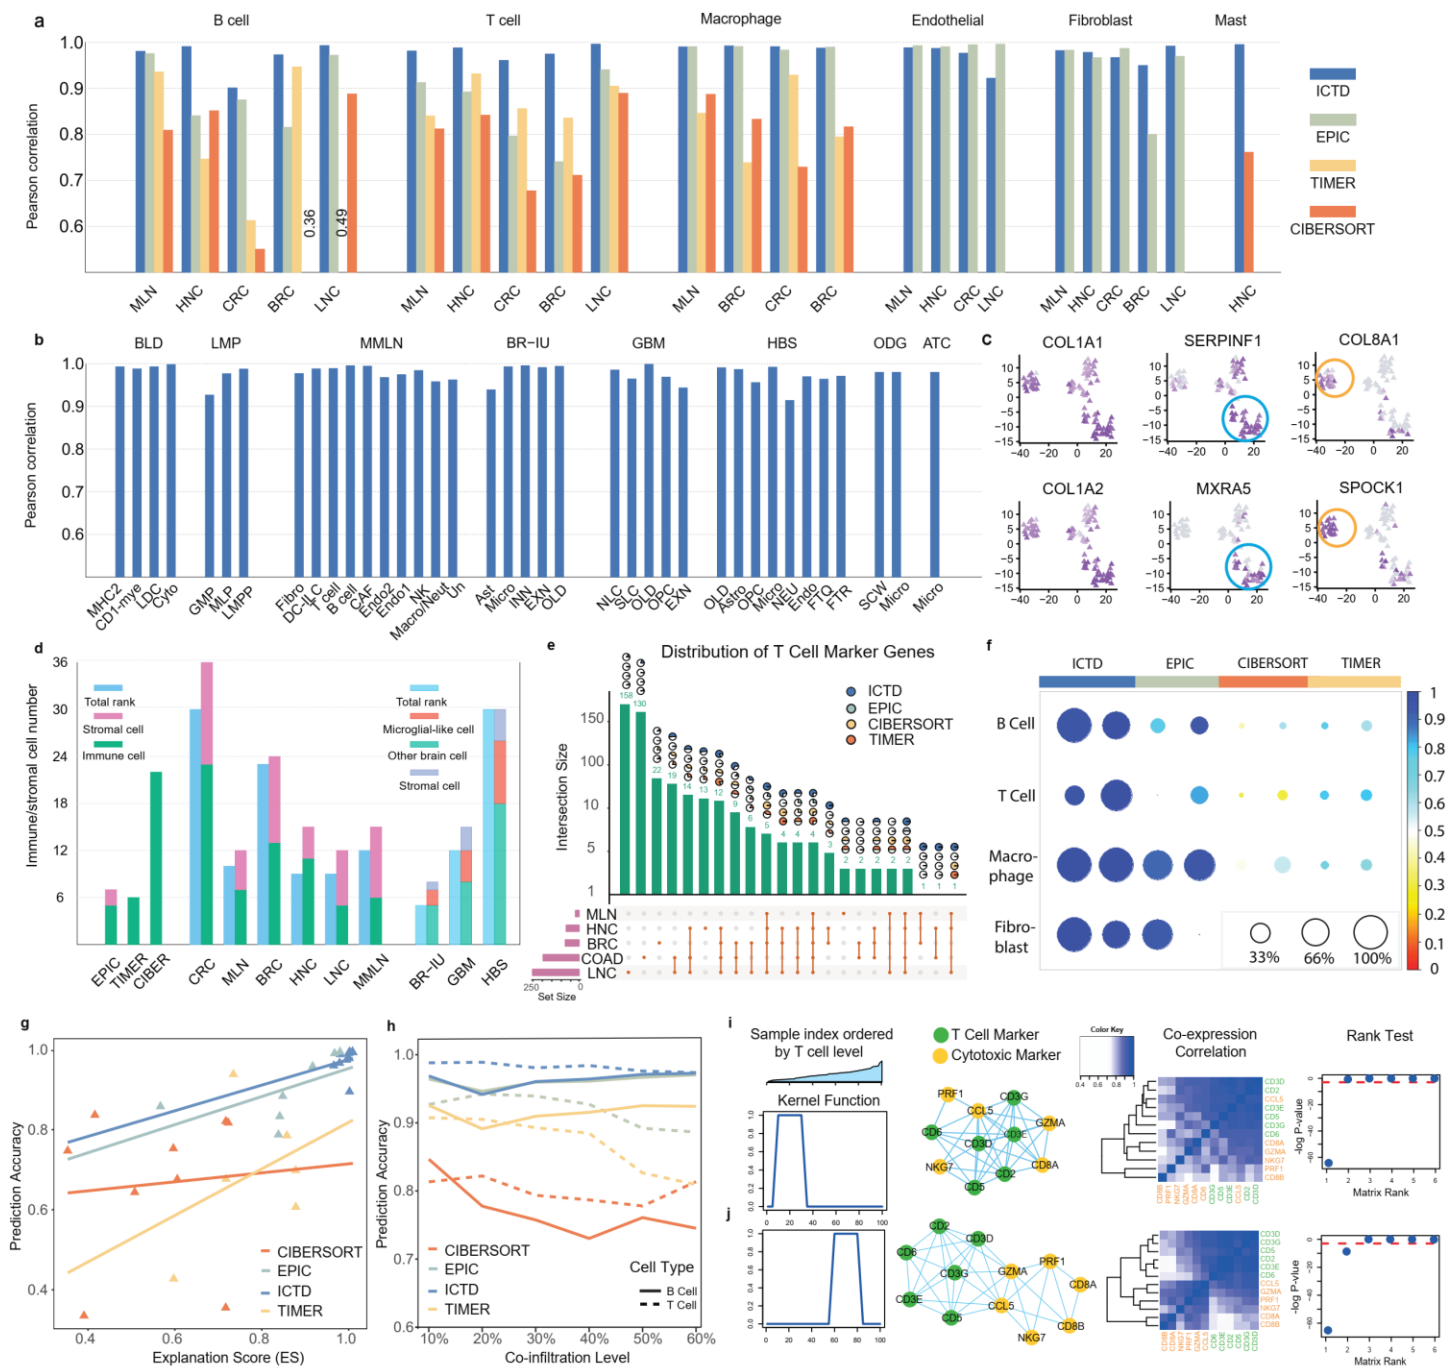

178

179 **Figure 2. Validation of ICTD by using single cell simulated bulk tissue data.** (a) PCC between true and predicted proportion  
180 of six cell types by ICTD, EPIC, TIMER and CIBERSORT, in the bulk tissue data simulated using scRNA-seq data collected  
181 from Melanoma (MLN), Head and Neck Cancer (HNC), Colorectal Cancer (CRC), Breast Cancer (BRC), and Lung Cancer (LNC).  
182 (b) PCC between true and predicted proportion of cell types and subtypes identified by ICTD in the bulk tissue data  
183 simulated by scRNA-seq data of myeloid and dendritic cell mixture (BLD), lymphoid and myeloid progenitor mixture (LMP),  
184 mouse melanoma (MMLN), normal brain cells nucleic sequencing generated in this study (BR-IU), glioblastoma (GBM),  
185 human normal brain (HBS), oligodendroglioma (ODG), and astrocytoma (ATC). Detailed cell type codes are given in  
186 **Supplementary Note**. (c) *t*-SNE plot of the marker genes of fibroblast subtypes in MLN scRNA-seq data, which were  
187 identified by ICTD from simulated human melanoma tissue data. In each panel, darker color denotes higher expression of  
188 the gene in a cell. (d) Consistency of the number of ICTD identified cell types and the matrix rank of the expression profile  
189 of the marker genes of identified cell types, i.e. the number of identifiable cell types, in each simulated tissue data. (e)  
190 Distribution of the true T cell marker genes identified in the five cancer data and their overlap with the actually used T cell  
191 signature genes in CIBERSORT, TIMER and EPIC. Each bar and number represent the number of genes specifically expressed  
192 by T cells in each of five cancer types, which is labeled in the dot plot on the bottom. The pie charts illustrate the proportion  
193 of the T cell marker genes used by ICTD (data adaptive) and CIBERSORT, TIMER and EPIC (held fixed). (f) Re-evaluation of  
194 robustness of cell type specific markers used by each method. The circle size represents the ratio of true marker genes  
195 among all genes used as marker genes for each cell type (row) for each method (column). The color represents the E-  
196 score level. The two columns of each method show the results of simulated MLN (left) and HNC (right) tissue data. The  
197 plots of the other three cancer types were shown in Supplementary Fig S6. (g) Dependency between explanation score (x-  
198 axis) and prediction accuracy (y-axis) of the cell type proportions given by the four methods. (h) PCC (y-axis) between true  
199 and predicted T and B cell proportions on simulated data with different level of T and B cell co-infiltration (x-axis). (i-j)  
200 prediction of varied T cell cytotoxicity level in simulated HNC data. From left to right, the four plots illustrate the kernel  
201 function used for local low rank screening, co-expression network of T cell and cytotoxic marker genes, heatmap of  
202 correlations between T cell and cytotoxic marker genes, and p values of the expression matrix rank of the T cell and  
203 cytotoxic marker genes, in the samples of low T cell infiltration (i) and high T cell infiltration level (j).

204 **Cell type co-linearity.** ICTD also demonstrated its superiority in handling co-linearity of cell proportions, caused  
205 by cells' functional dependencies. Our preliminary analysis on TCGA data suggested correlation among the  
206 immune and stromal cells to be as high as 0.94 (**Supplementary Notes**). We simulated batches of bulk tissue  
207 samples in each of which the cell proportions are intentionally set to have different levels of correlations to mimic  
208 the dependencies of different cell types in cancer microenvironment (**Online Methods**). Not surprisingly, while  
209 performance of regression based methods dropped significantly when co-linearity level was high, ICTD achieved  
210 high robustness and prediction accuracy at different levels of co-linearity. This owes to the data-adaptive  
211 selection of cell type specific markers and constrained NMF formulation adopted by ICTD. The four methods'  
212 prediction accuracy of B and T cells across different co-linearity levels in simulated human melanoma tissue data  
213 is shown in **Fig 2h**. In addition, significant correlations among ES, prediction accuracy, and co-linearity of cell  
214 proportions were identified (Supplementary Fig S4).

215 **Cell type specific functions.** ICTD can identify varied function of a certain cell type using a local low rank  
216 identification approach<sup>16</sup>. In the human head and neck cancer data, we identified the expression level of  
217 cytotoxic gene in the CD8+ T cells vary considerably in patient stratifications of different T cell abundances,  
218 suggesting mixed T cell exhaustion levels (**Supplementary Notes**). To evaluate the capability of ICTD in  
219 identifying varied T cell cytotoxicity level, we simulated bulk tissue data with different proportion and cytotoxicity  
220 level of T cells (**Online Methods**). ICTD conducted a local low rank screening with a kernel function along  
221 samples ordered by predicted T cell proportions. Our analysis clearly identified the linear space spanned by the  
222 T cell and cytotoxicity marker genes switches from rank-1 to rank-2 throughout the samples with low to high T  
223 cell levels, suggesting the identifiability of the varied cytotoxic level in the samples of high T cell infiltrations (**Fig**  
224 **2i-j**). On average, correlation level of 0.86 between the true cytotoxicity level per unit T cell and the prediction  
225 made by ICTD was observed (Supplementary Fig S5).

## 226 **Implications from real tissue data**

227 We then applied ICTD on a collection of human cancer, normal, blood and inflammatory tissue (CNBI) data,  
228 including 28 cancer and 11 normal tissue types from TCGA, 17 colorectal cancer, 7 triple negative breast cancer,  
229 7 blood tissue, and 11 human inflammatory disease data sets from GEO (Supplementary Table S3). We  
230 identified rank-1 markers of B, T, dendritic, general myeloid, macrophage, monocytes, neutrophil, fibroblast,

endothelial and adipocyte cell and their sub cell types in each dataset (**Fig 3a** and Supplementary Fig S7). A strong association between the number of identified cell types and the total rank of the matrix of marker genes was observed (**Fig 3b**). It is noteworthy that the types of resident cells most variable across different cancer types are the subtypes of adipocytes, fibroblast, and myeloid cells, which seem to be most prevalent in breast, colorectal, lung, pancreatic and stomach cancers, commonly known to have considerable stromal components. The complete set of cell types and their marker genes identified in each data set were summarized in Supplementary Table S4. In the TCGA datasets, 21 commonly “identifiable” cell and subtype types have been observed in more than 10 cancer types, including CD19/CD22 expressing regulatory-like B cell and CD79A/CD79B expressing activated B cell; total, CD8+, and CD4+ T cell; Neurexin and Caytaxin expressing Neuron cell; myofibroblast-like cell; Collagen 1/3/5, Collagen 4/15/18, Collagen 6, and Non-collagen expressing Fibroblast; Endothelial cell; MHC class II antigen presenting cell; MHC class I, pro-inflammatory cytokine releasing, chemokine and cytokine releasing Myeloid cells; complement pathway activated Macrophage and Monocytes; granulocytes; and adipocytes (**Fig 3c**).

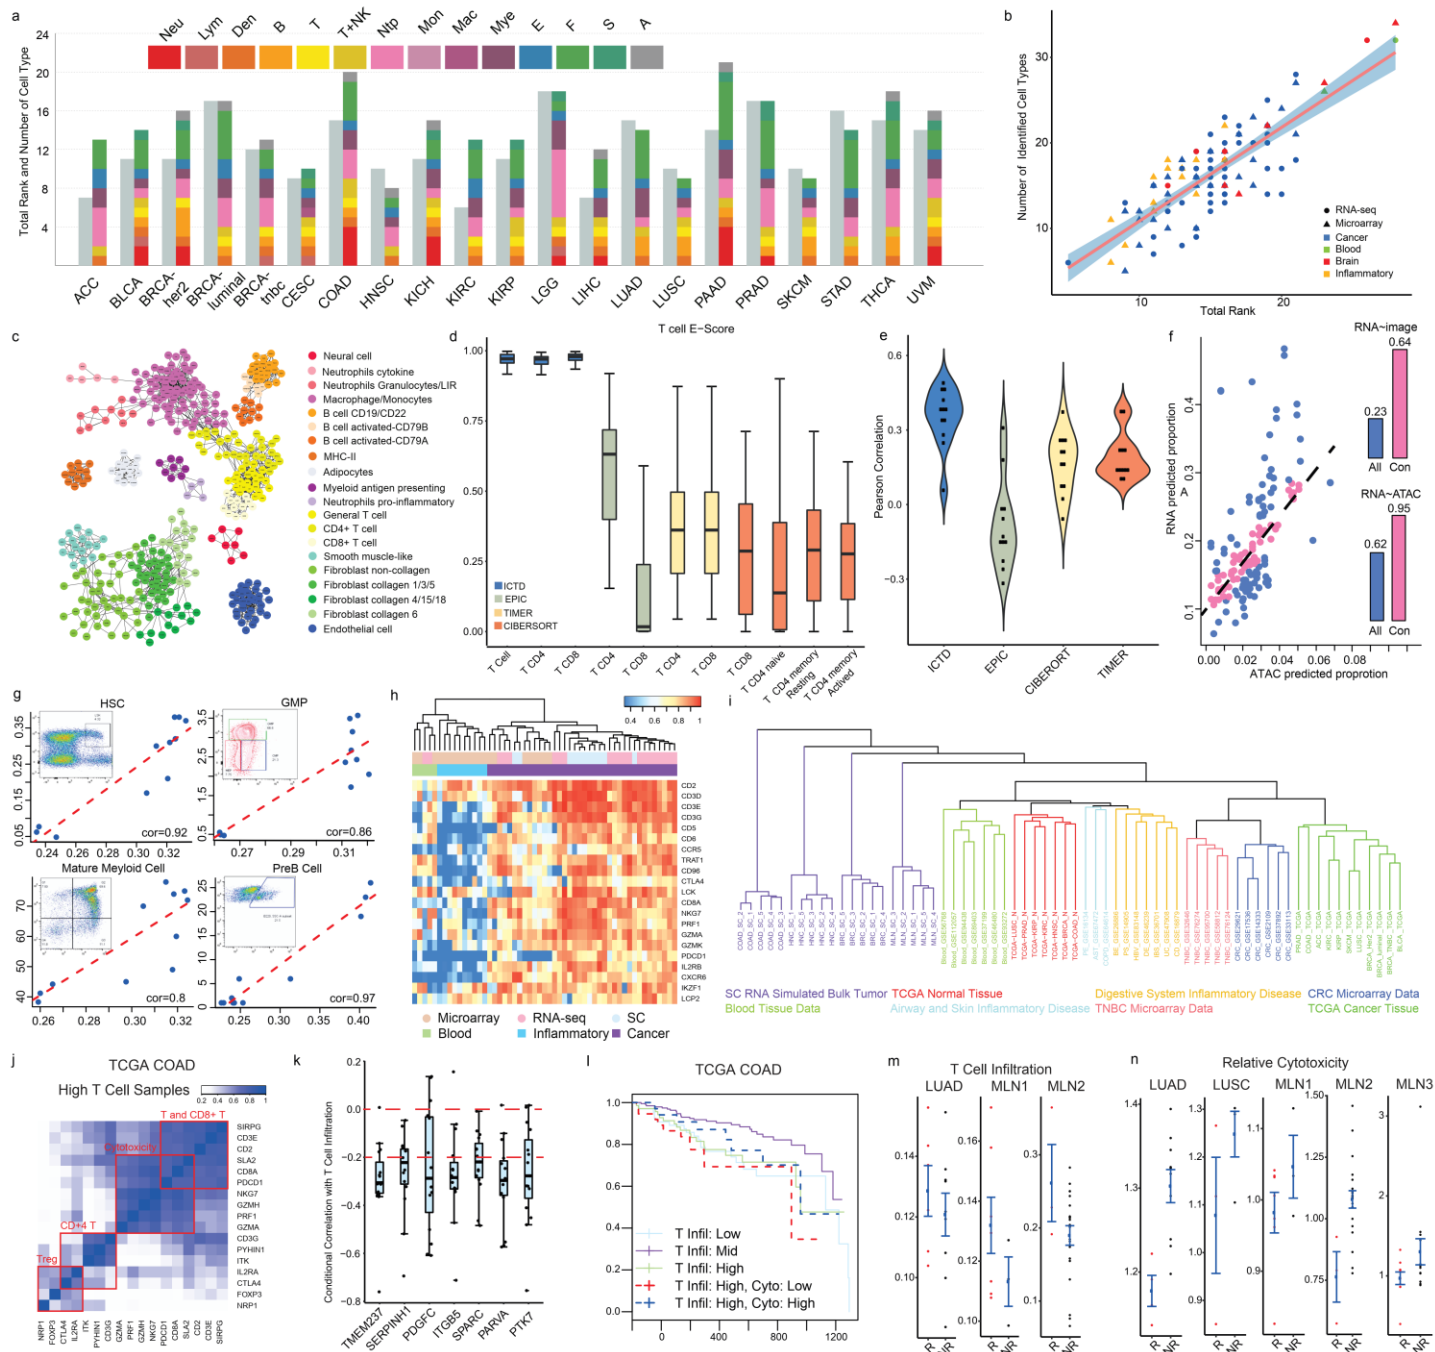

245 **Figure 3. Application of ICTD on real bulk tissue transcriptomics data.** (a) The number of identifiable cell types (colored  
246 bar) and the matrix rank (grey bar) of their marker genes identified by ICTD through all the TCGA cancer data; (b) Scatter  
247 plot of the number of identifiable cell types (y-axis) and the matrix rank (x-axis) of their marker genes identified by ICTD  
248 through all the analyzed data. (c) Network of the marker genes of the commonly identified cell (sub) types in the TCGA  
249 data. An edge between two genes means the two genes are both identified as markers of one cell type in more than 10  
250 analyzed TCGA data. (d) E-score of the T cell marker genes identified by ICTD and those used by EPIC, TIMER and  
251 CIBERSORT in TCGA data. E-score of other cell types are given in Supplementary Fig S11. (e) Correlation (y-axis) between  
252 the imaging data derived tumor infiltrated lymphocyte level and T cell proportion predicted by the four methods (x-axis)  
253 in 11 TCGA cancer. (f) Scatter plot of the T cell proportions predicted by TCGA BRCA RNA-seq and ATAC-seq data. Samples  
254 with highest consistency identified by the robust regression were pink colored. The bar plots represent the correlations  
255 of the proportions inferred by the RNA-Seq vs ATAC-Seq (or RNA-Seq vs imaging) in all the samples (PCC=0.62, or 0.23)  
256 and the most consistent samples (PCC=0.96, or 0.64). (g) Consistency of ICTD predicted (x-axis) and FACS measured (y-  
257 axis) cell proportions of four hematopoietic cell types. (h) Evaluation of T cell markers identified in CNBI data. In the  
258 heatmap, each row is the commonly identified T cell markers and each column is one data set. Color in the heatmap  
259 represents the E-score of each gene in each data set. Statistics of other cell types are given in Supplementary Fig S12. (i)  
260 Clustering of datasets from different microenvironment from different platforms based on a distance measure of the  
261 marker gene expression profiles of identifiable cell types (see **Online Methods**). This is to show the relative impact of  
262 technological platforms and tissue microenvironment on the variability of gene markers expressions. (j) Co-expression  
263 between T cell, CD8+ T cell, cytotoxic function, CD4+ T cell and T-reg marker genes in the samples with high T cell  
264 infiltration in TCGA COAD data. (k) Correlation between fibroblast cell expressing genes and T cell infiltration level  
265 conditional on the fibroblast cell level in 15 cancer types. (l) Survival curves of the TCGA COAD patients with low, medium  
266 and high T cell infiltration, and the high T cell infiltration patients with low and high cytotoxicity functions predicted by  
267 ICTD. (m) Variation of T cell infiltration level in response (R) and non-response (NR) patients in three independent  
268 checkpoint inhibitor treated clinical data. (n) Variation of T cell relative cytotoxic level in response (R) and non-response  
269 (NR) patients in five independent checkpoint inhibitor treated clinical data. LUAD, LUSC and MLN\* represents different  
270 sets of lung adenocarcinoma, lung squamous cell carcinoma and melanoma.

271 We confirmed markers of each commonly identifiable cell types in cancer microenvironment do have significant  
272 overlaps with the immune and stromal cell markers identified in normal microenvironment, suggesting these  
273 marker genes truly belong to immune and stromal cells rather than cancer cells (Supplementary Table S5). On  
274 average, the ICTD marker genes of each cell type have ES higher than 0.9, while the ES scores of the signature  
275 genes used by CIBERSORT, TIMER and EPIC are 0.22, 0.39 and 0.26, respectively. **Fig 3d** illustrate the ES of  
276 T cell (sub)type markers of the four methods. The level of tumor infiltrated lymphocytes (TIL) in 12 TCGA cancer  
277 types have been previously assessed by imaging data<sup>17</sup>. On average, the correlation between imaging predicted  
278 TIL and ICTD predicted T cell level is 0.4, comparing to 0.14, 0.2, and -0.11 with CIBERORT, TIMER, and EPIC  
279 predicted T cell level (**Fig 3e**). For other cell types, with a lack of ground truth, we rely on evaluating the ES  
280 scores of 3,552 known immune and stromal cells marker genes. It turns out that ICTD-predicted cell proportions  
281 achieved on average 0.56 R<sup>2</sup> value in explaining the 3,552 known immune and stromal cells marker genes, while  
282 the R<sup>2</sup> is 0.2, 0.24, and 0.18 for CIBERSORT, TIMER, and EPIC (Supplementary Table S6).

283 ICTD enables interactive deconvolution of matched multi-omics data. We co-deconvoluted the RNA-seq, ATAC-  
284 seq and DNA methylation data of five TCGA cancer types with available data (Online Methods). On average,  
285 more than 70% of the cell types identified from RNA-seq data were also identified in ATAC-seq or methylation  
286 data, including adipocytes, B cell, CD4+ and CD8+ T cell, macrophage, fibroblast, endothelial and dendritic cells  
287 (Supplementary Table S7). The correlations between cell proportions inferred from different data types are higher  
288 than 0.6. Fig 3f illustrated the strong consistency between the T cell proportion inferred from TCGA BRCA RNA-  
289 seq and ATAC-seq data. It is noteworthy the samples used in multi-omics experiments were from different parts  
290 of a tumor tissue, and some are less representative of the whole tumor tissue. ICTD utilizes a robust regression  
291 approach to remove such samples with inconsistent cell proportions inferred from the multiple data sources. As  
292 a result, the correlation between RNA-seq and imaging inferred T cell proportion was increased from 0.23 to  
293 0.64, wherein the imaging based proportion is deemed as a reliable reference here. This suggests the interactive  
294 co-deconvolution of multi-omics data has the potential to increase the robustness of the prediction.



295 Application of ICTD on 7 human normal brain, 5 neuro-degenerative disease and 4 brain cancer data sets  
296 identified 23 common cell types in central nervous system, including two astrocyte, three general glial, two  
297 oligodendrocyte, oligodendrocyte progenitor, excitatory and inhibitory neuron, MHC class I and II antigen  
298 presenting cells, general myeloid, macrophage, neutrophil and stromal like microglial cells, one endothelial, one  
299 epithelial, three ependymal, and one collagen expressing stromal like cell types (Supplementary Fig S8).

300 To experimentally validate ICTD in identifying rare sub cell types and predicting cell proportions in complex tissue  
301 system, we generated an RNA-seq data set of 12 mouse bone marrow tissue samples each with flow cytometry  
302 (FACS) measured cell numbers (see details in **Supplementary Notes**). ICTD successfully identified all the four  
303 hematopoietic cell types measured by FACS, namely hematopoietic stem cell, general myeloid progenitor,  
304 mature myeloid cell and pre-B cell, and achieved correlations of 0.92, 0.86, 0.8 and 0.97 between predicted and  
305 FACS measured cell proportions. Complete statistics including labeling matrix of mouse hematopoietic cell types,  
306 cell type specific markers identified by ICTD, cell proportions predicted by ICTD and measured by FACS were  
307 given in **Fig 3g**, Supplementary Table S8 and Supplementary Fig S9.

308 ICTD considers the variability of resident cell types and their marker genes across tissue microenvironments and  
309 technology platforms. **Fig 3h** illustrate the ES of T cell expressing genes in different CNBI data sets, suggesting  
310 a significant variation of the T cell markers in the microenvironment of different cancer, inflammatory disease  
311 and blood tissue, as well as under different experimental platforms<sup>18 19</sup>. To further investigate how the data set  
312 specific makers vary by disease/tissue micro-environments or experimental platforms, we further computed the  
313 averaged Jaccard distance between the marker genes of same cell types identified in any two CNBI or single  
314 cell simulated bulk datasets (**Supplementary Methods**). As illustrated in **Fig 3i**, the cell type marker genes vary  
315 drastically between cancer, normal inflammatory and blood tissues. Three distinct clusters were observed (1)  
316 TCGA cancer and other cancer, (2) single cell simulated cancer, and (3) TCGA normal and other inflammatory  
317 disease, and blood tissue. Among the cancer data, TCGA and other RNA-seq based cancer data sets is well  
318 separated from scRNA-seq simulated cancer data and the Microarray cancer data sets, and the later one is  
319 further divided into two sub-clusters containing independent CRC and TNBC data sets. Similarly, the TCGA  
320 RNA-seq and microarray data of normal, inflammatory conditions, and blood tissue form three distinct sub-  
321 clusters. Among the microarray data of chronic inflammatory conditions, the disease of digestive system and  
322 airway and skin tissues from two sub-clusters.

323 ICTD detected general T cell, fibroblast, and myeloid cells in all 28 analyzed TCGA cancer types, while the CD8+  
324 T, non-collagen extracellular component expressing fibroblast, and oxidative stress producing myeloid cells were  
325 identified as distinct cell types in only 10, 12, and 15 cancer types, respectively. We found that the markers of  
326 these functional sub cell types are detected as cell type specific functions instead of a cell type in some cancer  
327 types by the local low rank screening function. For the 19 cancer types where CD8+ T cell is not identified as a  
328 cell type, CD8+ T cell markers were treated as one T cell specific function in 15 cancer types, while in 4 cancer  
329 types, high concordance is observed between total T cell and CD8+T cell markers in all the samples, making the  
330 CD8+ T subtype not differentiable from the general T cell. **Fig 3j** illustrated the marker genes of general T, CD8+  
331 T, CD4+ T and T-reg cells form a distinct rank-4 submatrix in samples with high T cell infiltration, while the genes  
332 were less distinguishable in the complete TCGA COAD data (Supplementary Fig 10). This suggests the “locality”  
333 of finding identifiable cell types and functions, and hence it is necessary to implement a local low rank module  
334 detection approach. Similar locality was also observed for the marker genes of non-collagen expressing  
335 fibroblast and NADPH oxidase expressing myeloid cells in certain TCGA cancer types and other analyzed CRC  
336 and TNBC data sets (Supplementary Fig S10). We also conducted comprehensive screening to identify unknown  
337 immune/stromal cell type specific functional genes (**Online Methods**). 84 major functional modules were  
338 identified as common cell type specific functions in TCGA data (**Supplementary Notes**).

339 *Cell-cell interaction.* The prediction of cell proportions and functions by ICTD makes it possible to computationally  
340 characterize cell-cell interactions. We observed co-infiltrations among immune and stromal cell types with PCC  
341 in the range of -0.2-0.94 in all the analyzed TCGA cancer data (Supplementary Table S9). More importantly, the  
342 functional promotion or inhibition of cell type A to cell type B could now be examined by the correlations between  
343 the abundance level of A and the activity level of the function in B, conditional on the predicted proportion of B.  
344 We found seven genes expressed by fibroblast cells with significant negative conditional correlation with T cell  
345 infiltration in at least 10 out of 15 cancer types with high level of stromal cells ( $p < 0.01$ ) (**Fig 3k**). The seven genes  
346 execute functions related to the modification and synthesis of collagen and extracellular polysaccharide,  
347 suggesting a possible role of the dysregulated extracellular matrix composition in directing T cell infiltration.  
348 Similarly, the interactions of functions in two cell types can be computed by the correlation of the activity levels

of the two functions conditional to their proportions. We identified a low conditional correlation among CD8 T cell markers such as CD8A/CD8B and cytotoxic genes, and a high conditional correlation among general T, CD8+ T, and cytotoxic genes in 4 cancer types, suggesting possibly perturbed cytotoxicity of T cells in the first 19 cancer types, namely T cell exhaustion. We also observed a significant negative correlation ( $p < 0.01$ ) between the NADPH oxidase and T cell cytotoxicity levels conditional to the total myeloid and T cell in 11 out of the 25 TCGA cancer types (Supplementary Table S10). This is consistent with previous observation that NADPH oxidases produce reactive oxygen species (ROS) on the surface of myeloid-derived suppressor cells that suppress the cytotoxic function of T cells<sup>20</sup>.

*Clinical implications.* ICTD enables investigation of the impact on clinical prognosis by microenvironment. We conducted association analysis between the predicted cell proportions and varied functions with patient's overall survival in TCGA data, as well as patients' response in five clinical trial data with immune checkpoint inhibitor treatment (**Supplementary Methods**). We identified significant associations of patients' overall survival with T cell infiltration and relative cytotoxicity levels in 12 and 7 TCGA cancer types, respectively. More interestingly, in colorectal and ovarian cancer, we observed that patients with moderate level of T cell infiltration have the best overall survival comparing to the patients with high and low T cell levels (**Fig 3l**). We define the T cell's relative cytotoxicity (RC) level as the predicted cytotoxic function. level divided by the predicted total T cell level in each sample and observed patients with higher RC have significantly better overall survival. This clearly suggests the existence of T cell exhaustion and its association with poor prognosis. On the five clinical trial data, we noticed that patients with high T cell infiltration have better response to the treatment (**Fig 3m**), which is consistent with previously reported<sup>21</sup>. Moreover, the level of T cell cytotoxicity was observed to vary significantly in four datasets of melanoma, lung adenocarcinoma and lung squamous carcinoma. We observed the patients with lower RC tend to have better clinical response (**Fig 3n**), possibly due to more PD-1/PD-L1-mediated immuno-suppression in these tumors. It is noteworthy that association between T cell infiltration and patients' clinical outcome, and the identifiability of varied cytotoxic function show a high consistency between TCGA and the clinical trial data (Supplementary Table S10).

## Discussion

Our semi-supervised deconvolution method ICTD brought up a novel notion called "identifiability" of a cell type and cell type specific function, which was mathematically rigorously defined. By adaptively defining detectable cell types and selecting cell type markers based on the input data resolution, ICTD highly reduces the estimation bias, and also enables detection of novel cell (sub) types, and cell type functional activities. These features are particularly favorable when the goal is to computationally characterize the cell-cell interactions in large-scale tissue transcriptomic profiles. It is noteworthy that the "transcriptionally identifiable" cell types differ from those defined by cell differentiation lineage: some cell types on the lineage map may not be identifiable, while an "identifiable" cell type can be a certain cell or cell subtype, or the total of several cell types on the lineage map that express same gene markers. We believe the liberty of ICTD in its deconvoluted cell types makes it entirely data-driven, less biased to the training data, and it thus grants more sensible findings for downstream correlation analysis with other clinical and biological features.

ICTD is flexible in utilizing different types of training data to construct the labeling matrix, and we noticed using scRNA-seq profiles of cells from the real microenvironment of a certain cancer type, we are able to derive more tissue specific cell type markers than using microarray expression profiles of primary cells collected from healthy donors (**Supplementary Notes**). It is also worthy of mention that since ICTD is not fully supervised, we suggest at least 10 samples is needed for the method to work. While the method has increased type II error when the sample size is small, the identified rank-1 gene modules can be informative in guiding the flexible selection of cell type signature genes. Based on this, our ICTD R package was integrated with a regression based approach specifically for small sized samples with data-guided gene markers. When multi-omics data is available, we showed that co-deconvolution of matched multi-omics data could improve the prediction robustness, by excluding certain "outlier" samples with unstably predicted proportions using robust regression, and this function is available in the ICTD R package. The R package and web server version of ICTD are available at <https://github.com/changwn/ICTD> and <https://shiny.ph.iu.edu/ICTD/>.

Application of ICTD on TCGA pan-cancer data identified variations of T cell marker, cytotoxic marker and T cell exhaustion level, association between fibroblast expressing genes and T cell infiltration level, and association between ROS produced by myeloid cell and T cell cytotoxic level in different cancer types, suggesting the

401 capacity of ICTD in providing a comprehensive evaluation of tissue specific cell types, cell type specific function,  
402 and cell-cell interactions. Nevertheless, the sensitivity of detecting cell type varied function can be largely  
403 improved if more prior knowledge of functional marker genes is available. And additionally, more novel cell type  
404 functions can be predicted if the rank-1 module detection approach could be optimized such that certain modules  
405 may exist with respect to only a subset of samples, considering the prevalence of disease heterogeneity and  
406 subtype specificity. In other words, co-expression modules local to subset of samples may be desirable in  
407 revealing more cell type functions.

## 408 Online Methods

### 409 *Single cell, bulk cell and tissue transcriptomics data sets used in this study*

410 We collected bulk cell data of 11 types in human blood, inflammatory and cancer tissue microenvironment, 8  
411 types in human central nervous system, all generated by Affymetrix UA133 plus 2.0 Array; and 13 types in mouse  
412 inflammatory and tissue microenvironment, generated by Affymetrix Mouse Genome 430 2.0 Array. Detailed cell  
413 types include: *human stromal and immune cells*: fibroblast (34, 387), adipocytes (3, 26), endothelial cell (29,  
414 606), B cell (20, 404), CD4+ T cell (23, 443), CD8+ T cell (9, 130), natural killer cell (9, 141), dendritic cell (32,  
415 410), monocytes (22, 477), macrophages (21, 277), and neutrophil (10, 257); *human central nervous system*:  
416 neuron (16, 243), Schwann cell (2, 14), astrocyte (10, 57), ependymal cell (1, 39), oligodendrocyte (4, 30), and  
417 microglial cells (43,754), endothelial (29, 606), and stromal-like cell (34, 387); *mouse stromal and immune cells*:  
418 fibroblast (28, 277), adipocytes (3, 63), myocytes (myocyte), endothelial cell (10, 56), B cell (6, 31), CD4+ T cell  
419 (6, 80), CD8+ T cell (3, 34), natural killer cell (7, 35), dendritic cell (12, 84), monocytes (10, 46), macrophages  
420 (8, 102), neutrophils (11, 36), and mast cell (3, 31). The two numbers in the parenthesis indicate the number of  
421 datasets and samples of each cell type. We believe these cell types, together with tissue primary cells can cover  
422 major cell populations in the microenvironment of solid cancer, inflammatory disease, central nervous and  
423 hematopoietic system. 2854 samples of cancer cell line, human and mouse tissue index, and other cancer and  
424 normal tissue data were utilized as background to exclude the genes expressed by cancer or tissue primary cells.

425 The method was validated on single cell simulated bulk data. 13 single cell RNA-seq data sets generated by  
426 either C1/SMART-seq2 or 10x Genomics pipelines are used, and the cells are collected from (1) the TME of  
427 human solid cancer melanoma (8, 4486), breast (7, 535), colorectal (8, 375), head and neck (9, 5902), and lung  
428 cancer (8, 6630), (2) human glioma (5, 751), oligodendroglioma (7, 2728), and astrocytoma (7, 5171), (3) one  
429 public (8, 420) and one in-house (5, 1239) human normal brain sets, (4) human myeloid cell lineage and  
430 lymphoid cell lineage (3, 318) and monocyte/dendritic cell populations (4, 700), and (5) the TME of mouse  
431 melanoma (9, 2903). The two numbers indicate the number of cell types and cells of each data set.

432 We applied ICTD on real bulk tissue transcriptomic data of (1) 28 TCGA cancer types, (2) 11 TCGA normal  
433 tissue data, (3) 17 independent microarray data sets of colorectal cancer measured by different platforms; (4)  
434 metabric and 6 other triple negative breast cancer data sets; (5) 7 blood tissue RNA-seq and microarray data;  
435 (6) 11 human inflammatory disease data sets generated by Affymetrix UA133 plus 2.0 Array, and (7) 7 human  
436 normal brain, 5 neuro-degenerative disease and 4 brain cancer types. Detailed information of the bulk cell,  
437 scRNA-seq and bulk tissue data were provided in Supplementary Table S3. The sample information and  
438 selection, downloading and processing procedures of the public data, and sample and sequencing information  
439 of the inhouse generated data were given in **Supplementary Notes**.

### 440 *Preliminary derivation of the mathematical conditions of “Identifiable” cell types and cell type specific functions*

441 As detailed in **Supplementary Notes**, we analyzed the following characteristics of the cell type signature genes  
442 in the scRNA-seq and bulk tissue data of different disease context, experimental platforms and batches: (1) the  
443 consistency of cell type uniquely expressed genes were evaluated by their averaged expression level in different  
444 cell types of different scRNA-seq data sets; (2) inter- and intra- sample variations of cell type signature genes  
445 were characterized by the “drop-out” rates and multimodality of each gene’s expression profile in the scRNA-  
446 seq data of different samples; (3) matrix rank and expression scale of cell type uniquely expressed genes in bulk  
447 tissue data were evaluated by using BCV based rank test and Kolmogorov Smirnov (KS) test, and (4) immune  
448 and stromal cell co-infiltrations in cancer and inflammatory tissues were further assessed by using the averaged  
449 co-expression correlations among a small number of known cell type uniquely expressed genes.

450 Our evaluation suggested that NMF solution may not be unique if the used marker gene set are expressed by  
451 more than one cell type due to the prevalent co-linearity of cell proportions (**Supplementary Notes**). Hence only  
452 the cell type with uniquely expressed genes are transcriptomically “identifiable”, and the markers genes should  
453 also be stably expressed through cells of the same type so that its tissue level expression can reflect the cell’s  
454 population in the tissue. Specifically, if gene  $i$  is uniquely and stably expressed in cell type  $k$ , its gene expression  
455 can be expressed as  $X_{i,\cdot} = S_i^k \cdot P_{k,\cdot} + e$ , where  $S_i^k$  is the unit expression of  $i$  in  $k$ , and  $P_{k,\cdot}$  is the relative proportion  
456 of cell type  $k$  across all the samples. This shows that genes uniquely expressed by a cell type forms a (matrix)  
457 rank-1 submatrix, which form a necessary condition of “transcriptomically identifiable” cell type. On the other  
458 hand, a significant rank-1 structure of the expression profile of multiple genes  $X_{i,\cdot}, i = 1 \dots m$  suggests that these



459 genes are highly possibly expressed by a dominating cell type in the current tissue microenvironment or the  
 460 genes are with similar expression pattern in several cell types.

461 Noting cell type specific functional activities, such as the T cell cytotoxicity, are highly varied through different  
 462 patients, it is not feasible to use constant gene expressions level to characterize their activities. Denote the  
 463 averaged level of a functional gene  $i$  in cell type  $k$  in the sample  $j$  as  $S_{i,j}^k$ , our evaluation suggested that the  
 464 function is identifiable only if there exists a group of marker genes  $i = 1 \dots K$  satisfy  $S_{i,j}^k \cdot P_{k,j}, j = 1 \dots N$  form a  
 465 rank-1 matrix. Specifically, the cell type specific functional genes should share the same rank-1 space with the  
 466 cell type markers if there is no variation while the functional genes can be identified as the markers of a cell type  
 467 if  $S_{i,j}^k$  varied in all samples. If only a subset of samples has the functional variation, the low rank structure of the  
 468 functional genes will be absorbed by the cell type markers and diminish on the co-expression network of all the  
 469 samples. For such a case, the linear base of the varied function can be distinguished when the computation was  
 470 limited to the samples with the functional variation, i.e. a local low rank identification method is needed (See  
 471 more discussions in **Supplementary Notes**).

472 *A modified Bi-cross validation (BCV) based test of matrix rank*

473 Bi-cross validation (BCV) has been developed to estimate the matrix rank for singular value decomposition (SVD)  
 474 and Non-negative Matrix Factorization (NMF), which requires a prefixed low dimension  $K$  and two low rank  
 475 matrices for the approximation  $X_{M \times N} = W_{M \times K} \cdot H_{K \times N}$ . The error distribution of gene expression data is usually non-  
 476 identical/independent, majorly because a gene's expression can be affected by its major transcriptional  
 477 regulators, other biological pathways and experimental bias. Hence undesired biological characteristics and  
 478 experimental bias may form significant dimensions in a gene expression data<sup>22</sup>. In sight of this, we developed a  
 479 modified BCV rank test (**Algorithm 1**) to minimize the effect of the non-i.i.d errors in assessing the matrix rank of  
 480 a gene expression data.

---

481 **Algorithm 1: Modified Bi-cross validation matrix rank test**

---

482 *For*  $r = 1 \dots R$

483 *Sample* row index set  $I_r = \{i_1, i_2, \dots, i_{\lfloor \frac{M}{r} \rfloor} | i_p \in \{1 \dots M\}\}, \bar{I}_r = \{1 \dots M\} \setminus I_r$

484 *Sample* column index set  $J_r = \{j_1, j_2, \dots, j_{\lfloor \frac{N}{r} \rfloor} | j_p \in \{1 \dots N\}\}, \bar{J}_r = \{1 \dots N\} \setminus J_r$

485 *Split*  $X$  into for submatrix  $\begin{bmatrix} A_r & B_r \\ C_r & D_r \end{bmatrix}$ , where  $A_r = X[I_r, J_r], B_r = X[I_r, \bar{J}_r],$

486  $C_r = X[\bar{I}_r, J_r], D_r = X[\bar{I}_r, \bar{J}_r]$

487 *For*  $k = 1 \dots \min\left(\left\lfloor \frac{M}{r} \right\rfloor, \left\lfloor \frac{N}{r} \right\rfloor\right)$

488 
$$BCV(k, r) = \sum_{i=1}^{\lfloor \frac{M}{r} \rfloor} \sum_{j=1}^{\lfloor \frac{N}{r} \rfloor} \left\| A_r - B_r \hat{D}^{(k)+} C \right\|_F^2 (*)$$

489  $Rank_x \leftarrow 0$

490 *For*  $k = 1 \dots \min\left(\left\lfloor \frac{M}{r} \right\rfloor, \left\lfloor \frac{N}{r} \right\rfloor\right)$

491 *Do* t test between  $\{BCV(k, r) | r = 1 \dots R\}$  and  $\{BCV(k + 1, r) | r = 1 \dots R\}$

492 *if* (p. value  $< 0.01$  & mean  $(BCV(k + 1, r)) - \text{mean}(BCV(k, r)) < \text{msp}$ )

493  $Rank_x \leftarrow k + 1$

494 *Return*  $Rank_x$

495 (\*) Denote the SVD of a matrix  $D$  as  $D = U \Sigma V'$ , and Moore-Penrose inverse of  $D$   
 496 as  $D^+, D^+ = V' \Sigma^+ U$ , where  $\Sigma^+$  is a diganol matrix  $\text{diag}(\sigma_1^+, \sigma_2^+, \dots, \sigma_p^+)$  with  $\sigma_1^+ \geq$

497  $\sigma_2^+ \geq \dots \geq \sigma_p^+ \geq 0$ . Define  $\hat{D}^{(k)+} = \sum_{i=1}^k \sigma_i^+ v_i u_i$

---

498 **ICTD Step 1: Construction of labeling matrix to represent TME specific cell type marker genes**

499 A labeling matrix  $L_{M \times K}$  was first constructed to represent the genes that are overly expressed in a certain cell  
 500 type, where  $M$  is the number of genes and  $K$  is the number of cell types,  $L_{i,j} = \frac{1}{R}$  stands for the gene  $G_i$ 's  
 501 expression in cell type  $C_j$  is the  $R$ th highest among its expression in all the cells, and  $L_{i,j} = 0$  stands for  $G_i$  is not  
 502 a significant signature of cell type  $C_j$ . Two different approaches were developed to construct the labeling matrix  
 503 by using scRNA-seq or bulk cell data:

504 (1) scRNA-seq data:

505 For a scRNA-seq data set with annotated cell labels of  $K$  cell types and a given gene  $g$ , denote the expression  
 506 profile of  $g$  in cell type  $k$  as  $x_{g,\cdot}^k$ , its mean as  $x_g^k = \text{mean}(x_{g,\cdot}^k)$ , and the Z score of  $x_g^k$  as  $z_g^k$ . The cell type order  
 507 vector  $\mathbf{o}$  was further computed, where  $\mathbf{o}_j = k$ , if the  $j$ th largest value of  $x_g^k$  happens to be of cell type  $k$ . Then for  
 508 cell type  $\mathbf{o}_1$  to  $\mathbf{o}_K$ , the labeling matrix was built by

$$509 \quad L_{g,z_k} = \begin{cases} 0, & \text{if } z_g^k < -1.96 \\ \frac{1}{k}, & \text{if } x_{g,\cdot}^{\mathbf{o}_k} < x_{g,\cdot}^{\mathbf{o}_{k-1}}, z_g^k \geq -1.96 \\ \frac{1}{p}, & \text{if } x_{g,\cdot}^{\mathbf{o}_k} < x_{g,\cdot}^{\mathbf{o}_{p-1}} \text{ and } x_{g,\cdot}^{\mathbf{o}_k} \nless x_{g,\cdot}^{\mathbf{o}_p}, z_g^k \geq -1.96, 1 \leq p \leq k-1 \end{cases}$$

510 , where  $x_{g,\cdot}^{\mathbf{o}_i} < x_{g,\cdot}^{\mathbf{o}_j}$  denotes  $g$  is significant over expressed in cell type  $\mathbf{o}_j$  compare to cell type  $\mathbf{o}_i$ , which is tested  
 511 by using MAST<sup>23</sup>.

512 (2) bulk cell data:

513 We applied a non-parametric random walk based approach to identify if a gene has higher expression in certain  
 514 cell types comparing to others, i.e. a signature gene of the cell types, by using the training data set composed  
 515 by a large independent data sets of the cell types. ICTD enables the user to select the cell types specific to a  
 516 tissue microenvironment. For examples, bulk cell data of normal breast cell, breast cancer cell lines and breast  
 517 cancer tissue samples were selected as background to train the marker genes of immune and stromal cells for  
 518 analyzing breast cancer tissue data. The labeling matrix used in this paper were computed by using human  
 519 CCLE cell line, human body index and more than 20 human cancer tissue data as the background data. Batch  
 520 effect of the training data of each cell type were first removed by using COMBAT<sup>24</sup> and the expression profile of  
 521 each sample was further normalized by its mean.

522 Denote the combined expression matrix containing  $M$  genes for  $N$  samples of  $K$  cell types, and for each cell type,  
 523 we first calculated the expected frequency of the cell type, i.e. dividing the total number of samples for the cell  
 524 type ( $N_k, k = 1, \dots, K$ ) by the total number of samples  $N$ , denoted by  $E_i = N_k/N, i = 1, \dots, K$ . For a given gene  $g$ ,  
 525 denote  $x_{g,\cdot}$  and  $x_{g,\cdot}^k$  as its expression profile of all cell types and cell type  $k$ . We order the corresponding cell type  
 526 labels of these samples based on the expression value from large to small, denoted by vector  $\mathbf{z}$ , where  $\mathbf{z}_j = k$ ,  
 527 if the  $j$ th largest expression value in  $x_{g,\cdot}$  happens to be of cell type  $k$ . Denote  $O_k$  as the cumulative frequency of  
 528 cell type  $k$  over the expression order of  $x_{g,\cdot}$ , which is calculated as:

$$529 \quad O_{jk} = \frac{\sum_{m=1}^j \delta_{z_m=k}}{j}, j = 1, \dots, N$$

530 , where  $\delta_{z_m=k}$  is the indicating function for  $z_m = k$ . A discrepancy score vector  $\mathbf{d}$  between the observed and  
 531 expected cell type frequency was further defined as

$$532 \quad d_j = \sum_{k=1}^K (O_{jk} - E_k)^2, j = 1, \dots, N$$

533 , where  $\mathbf{d}$  is a non-negative vector of length  $N$ , and it attains a minimum value of zero at  $N$ . The larger the  
 534 maximum value  $d$  suggests the expression values are more enriched in certain cell types than the others. Denote

535  $m$  as the index of the maximum of  $d$ , i.e.  $d_m = \max(d_j)$ , and the cell type frequency at the best discrepancy as  
 536  $e_k^m = O_{mk} - E_k$ , the cell types were further ordered by  $e_k^m$  from large to small and denoted as  $o$ , where  $o_j = k$  if  
 537 the  $j$ th largest value of  $e_k^m$  happens to be of cell type  $k$ . Then for cell type  $o_1$  to  $o_K$ , the labeling matrix was built

538 by  $L_{g,z_k} = \begin{cases} 0, & \text{if } e_k^m \leq 0 \\ \frac{1}{k}, & \text{if } x_{g,\cdot}^{o_k} < x_{g,\cdot}^{o_{k-1}}, e_k^m > 0 \\ \frac{1}{p}, & \text{if } x_{g,\cdot}^{o_k} < x_{g,\cdot}^{o_{p-1}} \text{ and } x_{g,\cdot}^{o_k} \not< x_{g,\cdot}^{o_p}, e_k^m > 0, 1 \leq p \leq k-1 \end{cases}$ , where  $x_{g,\cdot}^{o_i} < x_{g,\cdot}^{o_j}$  denotes  $g$  is significant

539 over expressed in cell type  $o_j$  compare to cell type  $o_i$ , which is tested by Mann Whitney test.

540 *Exclusion of the expression of undesired cells*

541 ICTD can eliminate the expression signal from undesired cell types to excluder those cells from further analysis.  
 542 To do this, ICTD first identifies gene co-expression modules from the decentralized expression matrix of their  
 543 marker genes by using WGCNA and computes the first row base of each module by using SVD<sup>25</sup>. Then for each  
 544 gene that is positively co-expressed with one or several module(s) of the undesired cell type, its expression are  
 545 further projected to the complementary space spanned by the first row base of each of such modules (s). Denote  
 546 a decentralized tissue data as  $X$ , the data of pseudo-code of exclusion of the expression of undesired cells are  
 547 given below:

548 **Algorithm 2: Remove the low rank space of undesired cell types**

549  $Modules_c \leftarrow WGCNA(X_c)$

550 for  $i$  in  $Modules_c$

551  $U_i \Sigma_i V_i^T = SVD(X_i)$

552  $RB_c[i, ] \leftarrow V_i^T[1, ]$

553 for each gene in  $X$

554 for  $k$  in  $1:K$

555 if ( $\max(\text{cor}(RB_c, X_{genes})) > 0$ )

556  $i \leftarrow \underset{i}{\text{argmax}}(\text{cor}(RB_c[i, ], X_{genes}))$

557  $X_{gene} \leftarrow X_{gene} - X_{gene} \frac{RB_c[i, ] RB_c[i, ]^t}{||RB_c[i, ]||^2}$

558 return( $X$ )

559 In this paper, we first identified 1089 cancer cell genes, as evidenced by their consistent up-regulation in 11  
 560 cancer types of TCGA data and significant expression in CCLE cell line data (Supplementary Table S10).  
 561 Differential gene expression analysis was conduct by using Mann-Whitney test with FDR<0.05 as the significant  
 562 cutoff and significant expression in cancer cell line data is determined by  $\log(\text{FPKM}) > 2$ . In the analysis of one  
 563 specific cancer type, gene co-expression modules of the cancer genes were first identified. The linear space  
 564 spanned by the modules were further excluded by the complementary space projection. Our analysis on single  
 565 cell simulated and real bulk tissue data validated that such an elimination procedure can largely remove the  
 566 expression of the genes stably expressed in cancer cells while retaining the low rank structure of the gene  
 567 expressions from other cells (See **Supplementary Notes**).

568 *ICTD Step 2: Identification of rank-1 modules*

569 Highly co-expressed modules were identified using our in-house method, namely MRHCA<sup>26 27</sup>. More details  
 570 about the MRHCA based module identification and its rationality in our case are given in **Supplementary**  
 571 **Methods**.

572 The BCV test described in **Algorithm 1** is further applied to find the modules of rank-1, which possibly  
573 correspond to marker genes of identifiable cell types. The matrix rank of a module centered by a cell type  
574 uniquely expressed genes always increases with the module size, due to the genes less co-expressed with the  
575 hub may be expressed by other cell types. In this paper, we selected the modules of with hub significance  $p < 1e-3$ ,  
576 average co-expression correlation  $> 0.8$ , rank=1 ( $p < 1e-3$ ) and with at least seven genes, as possible markers  
577 of identifiable cell types.

578 *ICTD Step 3: Determine the number and select Rank-1 modules of “identifiable” cell types*

579 After identifying all sets of rank-1 marker genes, ICTD further determines the number of identifiable cell types,  
580 eliminates redundant and insignificant cell type marker genes, annotates each set of marker genes with a most  
581 likely cell type by using the labeling matrix, and build a marker gene – cell type representing matrix for the  
582 downstream deconvolution analysis.

583 Denote a rank-1 marker set  $G_i = \{g_1, \dots, g_{n_i}\}$  and labeling matrix  $L_{M \times K}$ , we first compute  $S_i = \{s_{i,1}, \dots, s_{i,K}\}$ , where  
584  $s_{i,k} = \sum_{j=1}^{n_i} L_{g_j,k}$  representing the enrichment level of  $G_i$  to the genes top expressed in cell type k. The  
585 significance level of  $s_{i,k}$ ,  $p_{s_{i,k}}$ , is assessed by a permutation test, and  $G_i$  is annotated as cell type with the minimal  
586  $p_{s_{i,k}}$  if  $\min(FDR(p_{s_{i,k}})) < Cutoff_{CES}$ . In this study,  $Cutoff_{CES}$  is selected as 0.01. The rank-1 markers annotated  
587 without a significant cell type annotation are excluded from further analysis. It is noteworthy that a larger  
588  $Cutoff_{CES}$  can be selected for identification of possible unknown cell types.

589 Rather than predefining the cell types, ICTD determines the cell types that are “identifiable”. In some  
590 circumstance, the proportion of the cell type with a lower resolution is a non-negative linear sum of the proportion  
591 of several cell types with higher resolutions, such as the myeloid cell proportion equals to the sum of macrophage  
592 and neutrophils when these two cell types dominate the myeloid cell populations in the tissue<sup>28</sup>. This linear  
593 dependency may correspond to a linear dependency between the row base of marker genes of cell types of  
594 different resolutions, which may result in number of identifiable cell types exceeding the rank of the linear space  
595 generated by the identified rank-1 markers.

596 To determine the number of identifiable cell types covered by the rank-1 marker genes, ICTD first construct a  
597 tree structure to represent the linear dependency among the identified rank-1 marker sets. A rank-1 marker set  
598 is considered as a root node if its row base can be non-negatively fitted by the row bases of other nodes with  
599  $R^2 > Cutoff_{R^2}$ . In this study,  $Cutoff_{R^2} = 0.9$  is selected. The rank-1 marker sets fitting each other with  $R^2 >$   
600  $Cutoff_{R^2}$  are merged together. All the root rank-1 marker sets are considered as markers of “identifiable” cell  
601 types and excluded from the further analysis. ICTD further computes the rank of the expression matrix of all the  
602 non-root rank-1 maker genes. Denoting the number of non-root rank-1 maker sets and their total rank as  $P$  and  
603  $\hat{P}$ . The total number of “identifiable” cell types among the non-root rank-1 marker sets is determined as  $\hat{P}$ .

604 A marker gene – cell type representation matrix is further computed for the downstream NMF analysis. Denote  
605 a selected rank-1 marker set as  $G_i = \{g_1, \dots, g_{n_i}\}$ ,  $i = 1 \dots P$ , its gene expression profile as  $X_{G_i}$ , and ot SVD as  
606  $X_{G_i} = U_i \Sigma_i V_i^t$ ,  $G_i$ 's self-explanation score is defined as  $\frac{\sum_{g \in G_i} cor(X_g, V_i[1])^2}{|G_i|}$ , i.e. the averaged R square of the genes'  
607 expression fitted by their first row base. The marker gene – cell type representation matrix C is constructed by

608 **Algorithm 3:**

609 **Algorithm 3: Construction of representation matrix**

610 *for i in 1 ... P*

611 *Compute the SVD of  $X_{G_i}$  as  $U_i \Sigma_i V_i^t$*

612 *Conduct a hierachical clustering of  $G_i$  in to  $\hat{P}$  clusters  $C_j$ ,  $i =$   
613  $1 \dots \hat{P}$ , by using euclidean distance between  $V_i[1]$*

614 *for j in 1 ...  $\hat{P}$*



615 
$$\text{Select rank 1 marker set } G_{k_j} \text{ by } \underset{j_k}{\operatorname{argmax}} \left( \frac{\sum_{g \in G_{j_k}} \operatorname{cor}(X_g, V_{j_k}[, 1])^2}{|G_{j_k}|} \mid G_{j_k} \in C_j \right)$$

616 
$$C_{\sum_{j=1}^{\hat{p}} n_{j_k} \times \hat{p}}[i, j] = \begin{cases} 0, & \text{if gene } i \notin G_{k_j} \\ 1, & \text{if gene } i \in G_{k_j} \end{cases}$$

617 
$$\text{return}(C_{\sum_{j=1}^{\hat{p}} n_{j_k} \times \hat{p}})$$

618 This step assigns marker genes of identifiable cell types that highly determines the prediction accuracy of the  
 619 deconvolution analysis. ICTD also includes three other options in constructing marker genes and C matrix of  
 620 identifiable cell types. The computational details and performance comparison of these methods were given in  
 621 **Supplementary Methods**.

622 *ICTD Step 4: Constrained Non-negative Matrix Factorization*

623 With the NMF constraint matrix  $CS_{X \times K}^{\text{NMF}}$ , each of the K cell type is assigned with at least one cell type uniquely  
 624 expressed gene (see derivations in method), hence the constraint NMF problem  $X_{M \times N} = S_{M \times K} \cdot P_{K \times N}$ ,  $S[I, k] \geq$   
 625  $0$ ,  $P[k, j] \geq 0$ ,  $S[I, k] = 0$  if  $CS^{\text{NMF}}[I, k] = 0$  does have a unique solution<sup>29</sup>. The rationale here is that the analysis  
 626 only focuses on cell types with uniquely expressed markers that form rank-1 structure, and the analysis is robust  
 627 to collinearity of cell proportions due to the uniqueness of solution. Specifically, for the  $p$ th disconnected  
 628 subgraph with  $M_p$  genes,  $\text{rank} = K_p$ , and constraint matrix  $C_{M \times K}$ , the NMF of  $X_{M \times N} = S_{M \times K} \cdot P_{K \times N}$  is solved by  
 629  $\min_{S, P} (\|X_{M \times N} - S_{M \times K} \cdot P_{K \times N}\|_F^2 + \lambda \cdot \operatorname{tr}(S_{M \times K}^T \cdot (1 - C_{M \times K})))$ , where  $S_{M \times K}$  and  $P_{M \times K}$  are the predicted signature and  
 630 proportion of K cell types. Variables with fitted S that are highly varied from C are further removed. Detailed  
 631 solution of the constrained NMF problem was given in **Supplementary Methods**. It is noteworthy when  $\lambda \rightarrow \infty$ ,  
 632  $P_{i, j}$  is the first row base of the SVD of  $\operatorname{Diag}(C_{, j}) \cdot X$ , where  $\operatorname{Diag}(C_{, j})$  is the diagonal matrix generated by  $C_{, j}$ . In  
 633 this study,  $\lambda$  was selected based the best prediction accuracy trained on single cell simulated bulk data.

634 *ICTD Step 5: Co-deconvolution of matched multi-omics data*

635 Multi-omics, including epigenetic and chromatin profiles, provide equally important characterization of tissue  
 636 compositions as transcriptomic profiles. When multiple omics data are available for the same tissues, it is  
 637 reasonable to assume that cell relative proportions deduced from each of the omics profile should be strongly  
 638 associated. Based on this, co-deconvolution of matched multi-omics data could be used to cross-validate and  
 639 robustify the proportion predictions, as detailed in **Algorithm 4**:

640 **Algorithm 4: Co-deconvolution of matched multi-omics data**

641 **Input:**

642  $U^{(0)} = \emptyset$ , denoting the set of outlier samples.

643 For  $i = 1 \dots N_{\text{iter}}$

644 Run deconvolution on each of omic profile  $l$  where only samples not in  $U^{(i-1)}$  are used, denoted the  
 645 predicted proportion matrix as  $P^{(i), l}$ ,  $l = 1, \dots, L$ , of dimension  $K \times N_i$ , where  $K$  is the total number of cell types, and  
 646  $N_i$  the total number of tissues of the current run;

647 Perform robust mixture regression using robust trimmed likelihood estimation (TLE) approach, between  
 648 the  $r_1$ th row of  $P^{(i), l_1}$  and  $r_2$ th row of  $P^{(i), l_2}$

649 Collect all the outlier samples based on the robust TLE approach for all the runs, and denote the union  
 650 set of outlier samples as  $U^{(i)}$

651 Repeat 1-3, and stop if  $U^{(i)} = \emptyset$

652 *ICTD Step 6: Conditional local low rank test of cell type varied function*

653 Identifiable cell type specific function is defined by a group of genes that form a local rank-1 structure conditional  
654 on the estimated proportion of the cell type. A kernel function based local low rank structure screening method  
655 is developed for identification of such local rank-1 structures. Denote  $P_k = \{p_1^k, p_2^k, \dots, p_n^k\}$  as predicted proportion  
656 of cell type  $k$  through the  $n$  samples and  $P_{(k)} = \{p_{k(1)}, \dots, p_{k(n)}\}$  as sorted  $P_k$  with an increasing order,  $G_{I_k}$  as the  
657 rank-1 marker genes of cell type  $k$ , and  $G_{F_k}$  is a gene set containing possible marker genes of a varied function  
658 of  $k$ , the level of functional activity and its associated marker genes can be identified by **Algorithm 5**:

---

659 **Algorithm 5: BCV screening of a local low rank structure**

---

660 For a given data  $X$  and cell proportion  $P_k = \{p_1^k, p_2^k, \dots, p_n^k\}$

661     Sort  $P_{(k)}$  by increasing order:  $P_{(k)} = \{p_{k(1)}, \dots, p_{k(n)}\}$

662     Reorder the samples in  $X$  into  $X^0$  by the order of  $P_{(k)}$

663 For  $i = 1 \dots N$

664     Do BCV test of  $X_i \triangleq X^0[(G_{I_k}, G_{F_k}), ] \cdot \text{diag}(K_i) (*)$

665          $p_{ij}$  = FDR corrected p value of the rank  $j$  of  $X_i$

666     If  $\exists i^*$  and  $j > 1$ ,

667     s. t.  $p_{ij} < 0.05$  for all  $i \geq i^*$  and  $p_{ij} \geq 0.05$  for all  $i < i^*$

668          $\rightarrow G_{F_k}$  contains marker genes of a varied function

669     Identify gene froming the rank 1 matrices in  $X[G_{F_k}, (i^* \dots N)]$

670     (\*)  $K_i$  is a nonnegative kernel function centered at  $i$ :

$$671 \quad K_i(z) = \begin{cases} 0 & , \text{ if } |z - i| \geq C_1 \\ \frac{|z-i-C_2|}{C_1-C_2} & , \text{ if } C_1 < |z - i| < C_2, C_2 < C_1, z = 1..N \\ 1 & , \text{ if } |z - i| \leq C_2 \end{cases}$$

672 The idea of this algorithm is that the genes of a cell type specific function may form additional ranks in the  
673 samples with high proportion of the cells, which can be identified by the BCV test when only looking at those  
674 samples. The kernel function is to smooth the inter-sample variation in cell proportions (see more details in  
675 **Supplementary Methods**).

676 In this paper,  $G_{F_k}$  is selected for each cell type  $k$  by the genes annotated as top expressed by cell type  $k$  in the  
677 labeling matrix and with more than 0.8 co-expression correlation with the cell type  $k$ 's proportion. ICTD enables  
678 users to predefine  $G_{F_k}$  and select proportion of cell type  $k$  for a specified analysis, such as using known markers  
679 for prediction of T cell cytotoxicity<sup>30</sup>. The functional activity level of each set of gene markers are then predicted  
680 by its first row base in the samples  $i \geq i^*$  by SVD. Averaged activity level per cell is further estimated by dividing  
681 the predicted functional activity level by the predicted cell type proportion.

682 *Single cell simulated Bulk Tissue data*

683 Cell types in each scRNA-seq data were labeled by the cell clusters provided in the original works or by using  
684 Seurat pipeline with default parameters. Detailed information of the scRNA-seq data and cell type annotation is  
685 given in **Supplementary Table S3 and Notes**. For each data set, we simulate bulk tissue data with three steps:  
686 (1) randomly generate the proportion of each cell type, called true proportion in this paper, that follows a Dirichlet  
687 distribution, (2) enforce a certain co-infiltration level of two selected cell types, and (3) draw cells randomly from  
688 the cell pool with replacement according to the cell type proportion, and sum up the expression values of all cells  
689 to produce a pseudo bulk tissue data. More details are provided in **Algorithm 6**:

---

690 **Algorithm 6: simulate bulk data using single cell**

---

691 Input: single cell gene expression matrix  $S^{m \times n}$ ; cell type label vector  $l$ ; patient number  $p$ ; total cell number  $N$ .

692 (optional)  $CoF \in \{0, 1\}$ ;  $Corr \in (0, 1]$ ;  $row1, row2$ .

693 1. Find the cell type number  $k$  from  $l$ .

694 2. Generate  $D^{k \times p}$ , s. t.  $\mathbf{d}_{:,i} \sim \text{Dirichlet}(\boldsymbol{\alpha})$ ,  $i = 1, \dots, p$ ;  $\boldsymbol{\alpha} = (\alpha_1, \dots, \alpha_k) \sim U(0,1)$ .

695 3. If  $CoF$  is TRUE go to step 4, else go to step 7.

696 4.  $v1, v2 \leftarrow D_{ij}$ ,  $i \in \{row1, row2\}$ ,  $j \in \{1, \dots, p\}$ .

697 5. Generate  $u1, u2$ , s. t.  $|cor(u1, u2) - x| \leq 0.05$ .

698 6.  $v1 \leftarrow u1, v2 \leftarrow u2$ .

699 7. For  $i = 1, \dots, p$ ;  $j = 1, \dots, k$ :

700 i)  $\mathbf{sc}_{i,j} \sim \text{Sample } D_{j,i} \cdot N$  cells from the pool of cell type  $j$  with replacement ;

701 ii)  $B_{:,i} = \frac{\sum_{t \in \mathbf{sc}_{i,j}} S_{:,t}}{\text{length}(\mathbf{sc}_{i,j})}$

702 8. Return  $B^{m \times p}$ ,  $D^{k \times p}$ .

703 , in which:

704  $Corr$  is the coinfiltration level parameter if  $CoF$  is TRUE;

705  $CoF$  is the coinfiltration flag to indicate whether adding dependency to two cell types or not;

706  $row1, row2$  are the cell type location that indicate two selected cell types adding  $Corr$  dependency;

707  $\mathbf{sc}_{i,j}$   $i \in \{1, \dots, p\}$ ,  $j \in \{1, \dots, k\}$  is the selected single cells sampling randomly from the cell pool with replacement;

708  $B^{m \times p}$  is the simulated bulk tissue expression value matrix;

709  $D^{k \times p}$  is the true proportion matrix.

710

711 The Dirichlet distribution matrix was generated with R package “DirichletReg” (version 3.5.3). In order to evaluate  
 712 the robustness of the deconvolution method while co-infiltration exists, we add different levels of co-infiltrations  
 713 in our simulated bulk data to four pairs of cells that are commonly known to co-infiltrate in cancer tissue, namely,  
 714 B/T cell, T/NK cell, Fibroblast/Endothelial cell, and B/Dendritic cell. (Supplementary Figure S13). For a robust  
 715 method evaluation, five replicates were generated in the simulation of each data set and at each co-infiltration  
 716 parameter.

717

718 *Explanation Score to evaluate the performance of our deconvolution method*

719 We assessed the methods’ performance by the correlation between predicted and known proportion of each cell  
 720 type in simulated data, which is inapplicable in the real tissue data. Thus, we developed

721 An explanation score (ES) was developed to evaluate the goodness that each marker gene’s expression is fitted  
 722 by the predicted cell proportions:

723

$$EScore(x) = 1 - \frac{\sum_{j=1}^N (x_j^* - \hat{x}_j)^2}{\sum_{j=1}^N (x_j^*)^2}$$

724

$$\hat{x}_j = \sum_{k=1}^{k_x} \beta_k^x p_j^k, \beta_k^x \geq 0$$

725 where  $x_j^*$  is the observed expression of marker gene  $x$  in sample  $j$ ,  $\hat{x}_j$  is the  $x$ ’s expression level in  $j$  predicted  
 726 by a non-negative regression model of the predicted proportion  $p_j^k$ ,  $k = 1 \dots k_x$  of  $k_x$  cell types that express  $x$ ,  
 727 and  $\beta_k^x$  are parameters. Intuitively, with correctly selected marker genes, the marker gene’s expression can be  
 728 well explained by the predicted proportions of the cell types that express the gene. Hence, a high ES score is a  
 729 necessary but not sufficient condition for correctly selected marker genes and predicted cell proportion.

730

731 **References**

- 732 1 Hackl, H., Charoentong, P., Finotello, F. & Trajanoski, Z. Computational genomics tools for dissecting tumour-  
733 immune cell interactions. *Nat Rev Genet* **17**, 441-458, doi:10.1038/nrg.2016.67 (2016).
- 734 2 Newman, A. M. *et al.* Robust enumeration of cell subsets from tissue expression profiles. *Nat Methods* **12**, 453-  
735 457, doi:10.1038/nmeth.3337 (2015).
- 736 3 Li, B. *et al.* Comprehensive analyses of tumor immunity: implications for cancer immunotherapy. *Genome Biol*  
737 **17**, 174, doi:10.1186/s13059-016-1028-7 (2016).
- 738 4 Racle, J., de Jonge, K., Baumgaertner, P., Speiser, D. E. & Gfeller, D. Simultaneous enumeration of cancer and  
739 immune cell types from bulk tumor gene expression data. *Elife* **6**, doi:10.7554/eLife.26476 (2017).
- 740 5 Vallania, F. *et al.* Leveraging heterogeneity across multiple datasets increases cell-mixture deconvolution  
741 accuracy and reduces biological and technical biases. **9**, 4735 (2018).
- 742 6 Abbas, A. *et al.* Immune response in silico (IRIS): immune-specific genes identified from a compendium of  
743 microarray expression data. **6**, 319 (2005).
- 744 7 Abbas, A. R., Wolslegel, K., Seshasayee, D., Modrusan, Z. & Clark, H. F. J. P. o. Deconvolution of blood microarray  
745 data identifies cellular activation patterns in systemic lupus erythematosus. **4**, e6098 (2009).
- 746 8 Wang, X., Park, J., Susztak, K., Zhang, N. R. & Li, M. J. N. c. Bulk tissue cell type deconvolution with multi-subject  
747 single-cell expression reference. **10**, 380 (2019).
- 748 9 Newman, A. M. *et al.* Determining cell type abundance and expression from bulk tissues with digital cytometry.  
749 *Nat Biotechnol* **37**, 773-782, doi:10.1038/s41587-019-0114-2 (2019).
- 750 10 Finotello, F. & Trajanoski, Z. J. C. I., Immunotherapy. Quantifying tumor-infiltrating immune cells from  
751 transcriptomics data. **67**, 1031-1040 (2018).
- 752 11 Varn, F. S., Wang, Y., Mullins, D. W., Fiering, S. & Cheng, C. Systematic Pan-Cancer Analysis Reveals Immune Cell  
753 Interactions in the Tumor Microenvironment. *Cancer Res* **77**, 1271-1282, doi:10.1158/0008-5472.CAN-16-2490  
754 (2017).
- 755 12 Li, B., Liu, J. S. & Liu, X. S. Revisit linear regression-based deconvolution methods for tumor gene expression  
756 data. *Genome Biol* **18**, 127, doi:10.1186/s13059-017-1256-5 (2017).
- 757 13 Dormann, C. F. *et al.* Collinearity: a review of methods to deal with it and a simulation study evaluating their  
758 performance. **36**, 27-46 (2013).
- 759 14 Frishberg, A. *et al.* Cell composition analysis of bulk genomics using single-cell data. *Nat Methods* **16**, 327-332,  
760 doi:10.1038/s41592-019-0355-5 (2019).
- 761 15 Li, Z. & Wu, H. J. G. b. TOAST: improving reference-free cell composition estimation by cross-cell type differential  
762 analysis. **20**, 190 (2019).
- 763 16 Lee, J., Kim, S., Lebanon, G., Singer, Y. & Bengio, S. J. T. J. o. M. L. R. LLORMA: Local low-rank matrix  
764 approximation. **17**, 442-465 (2016).
- 765 17 Saltz, J. *et al.* Spatial organization and molecular correlation of tumor-infiltrating lymphocytes using deep  
766 learning on pathology images. **23**, 181-193. e187 (2018).
- 767 18 Venteicher, A. S. *et al.* Decoupling genetics, lineages, and microenvironment in IDH-mutant gliomas by single-cell  
768 RNA-seq. **355**, eaai8478 (2017).
- 769 19 Tirosh, I. *et al.* Dissecting the multicellular ecosystem of metastatic melanoma by single-cell RNA-seq. **352**, 189-  
770 196 (2016).
- 771 20 Gaborivich, D. I. & Nagaraj, S. J. N. r. i. Myeloid-derived suppressor cells as regulators of the immune system. **9**,  
772 162 (2009).
- 773 21 Jiang, P. *et al.* Signatures of T cell dysfunction and exclusion predict cancer immunotherapy response. **1** (2018).
- 774 22 Lopez, R., Regier, J., Cole, M. B., Jordan, M. I. & Yosef, N. J. N. m. Deep generative modeling for single-cell  
775 transcriptomics. **15**, 1053 (2018).
- 776 23 Finak, G. *et al.* MAST: a flexible statistical framework for assessing transcriptional changes and characterizing  
777 heterogeneity in single-cell RNA sequencing data. **16**, 278 (2015).
- 778 24 Johnson, W. E., Li, C. & Rabinovic, A. J. B. Adjusting batch effects in microarray expression data using empirical  
779 Bayes methods. **8**, 118-127 (2007).
- 780 25 Langfelder, P. & Horvath, S. J. B. b. WGCNA: an R package for weighted correlation network analysis. **9**, 559  
781 (2008).
- 782 26 Zhang, Y. *et al.* MRHCA: a nonparametric statistics based method for hub and co-expression module  
783 identification in large gene co-expression network. **6**, 40-55 (2018).



- 784 27 Zhang, C., Liu, C., Cao, S. & Xu, Y. J. J. o. m. c. b. Elucidation of drivers of high-level production of lactates  
785 throughout a cancer development. **7**, 267-279 (2015).
- 786 28 Chen, C.-Z., Li, L., Lodish, H. F. & Bartel, D. P. J. s. MicroRNAs modulate hematopoietic lineage differentiation.  
787 **303**, 83-86 (2004).
- 788 29 Huang, K., Sidiropoulos, N. D. & Swami, A. J. I. T. o. S. P. Non-negative matrix factorization revisited: Uniqueness  
789 and algorithm for symmetric decomposition. **62**, 211-224 (2013).
- 790 30 Van Acker, H. H., Capsomidis, A., Smits, E. L. & Van Tendeloo, V. F. J. F. i. i. CD56 in the immune system: more  
791 than a marker for cytotoxicity? **8**, 892 (2017).

792
